# Supplementary material
Source: Research Square preprint supplement (doi:10.21203/rs.3.rs-6475/v3)
Supplement: Supplementary file 1 [file 586c326cb67c9bda3dd0c462.docx]

### HPV-LR

. stepwise, pr(0.1) hierarchical : regress hpv_low (sexpart rauchen kohabi)

begin with full model

p = 0.0000 < 0.1000 keeping sexpart rauchen kohabi

p < 0.1000 for all terms in model

Source | SS df MS Number of obs = 2,208

-------------+---------------------------------- F(3, 2204) = 14.65

Model | 3.53988572 3 1.17996191 Prob > F = 0.0000

Residual | 177.524879 2,204 .080546678 R-squared = 0.0196

-------------+---------------------------------- Adj R-squared = 0.0182

Total | 181.064764 2,207 .082041126 Root MSE = .28381

------------------------------------------------------------------------------

hpv_low | Coef. Std. Err. t P>|t| [95% Conf. Interval]

-------------+----------------------------------------------------------------

sexpart | .059896 .010224 5.86 0.000 .0398464 .0799455

rauchen | -.0157839 .0132249 -1.19 0.233 -.0417185 .0101507

kohabi | -.0007331 .0032026 -0.23 0.819 -.0070136 .0055474

_cons | -.0139063 .0655269 -0.21 0.832 -.1424073 .1145947

------------------------------------------------------------------------------

. logistic hpv_low i.sexpart, vce(robust) baselevels

Logistic regression Number of obs = 2,216

Wald chi2(2) = 36.72

Prob > chi2 = 0.0000

Log pseudolikelihood = -646.22104 Pseudo R2 = 0.0346

------------------------------------------------------------------------------

| Robust

hpv_low | Odds Ratio Std. Err. z P>|z| [95% Conf. Interval]

-------------+----------------------------------------------------------------

sexpart |

1 | 1 (base)

2 | 3.411788 1.018741 4.11 0.000 1.900282 6.125563

3 | 5.951488 1.830392 5.80 0.000 3.257143 10.87463

|

_cons | .0287611 .0080926 -12.61 0.000 .0165691 .0499242

#### HPV LR for different age groups

. by gruppe, sort : logistic hpv_low i.sexpart, vce(robust) baselevels

--------------------------------------------------------------------------------------------------

-> gruppe = 83/84

Logistic regression Number of obs = 623

Wald chi2(2) = 15.34

Prob > chi2 = 0.0005

Log pseudolikelihood = -159.39581 Pseudo R2 = 0.0576

------------------------------------------------------------------------------

| Robust

hpv_low | Odds Ratio Std. Err. z P>|z| [95% Conf. Interval]

-------------+----------------------------------------------------------------

sexpart |

1 | 1 (base)

2 | 4.357827 3.25413 1.97 0.049 1.008441 18.8317

3 | 10.78261 8.053627 3.18 0.001 2.494329 46.61159

|

_cons | .016129 .0115058 -5.79 0.000 .0039847 .0652861

------------------------------------------------------------------------------

--------------------------------------------------------------------------------------------------

-> gruppe = 88/89

Logistic regression Number of obs = 554

Wald chi2(2) = 13.89

Prob > chi2 = 0.0010

Log pseudolikelihood = -171.11638 Pseudo R2 = 0.0452

------------------------------------------------------------------------------

| Robust

hpv_low | Odds Ratio Std. Err. z P>|z| [95% Conf. Interval]

-------------+----------------------------------------------------------------

sexpart |

1 | 1 (base)

2 | 3.321782 1.795999 2.22 0.026 1.151196 9.585021

3 | 7.418918 4.247986 3.50 0.000 2.415196 22.78918

|

_cons | .0327869 .0166751 -6.72 0.000 .0121001 .0888408

------------------------------------------------------------------------------

Logistic regression Number of obs = 341

Wald chi2(2) = 6.71

Prob > chi2 = 0.0350

Log pseudolikelihood = -105.8286 Pseudo R2 = 0.0434

------------------------------------------------------------------------------

| Robust

hpv_low | Odds Ratio Std. Err. z P>|z| [95% Conf. Interval]

-------------+----------------------------------------------------------------

sexpart |

1 | 1 (base)

2 | 4.538012 2.842359 2.41 0.016 1.329597 15.48856

3 | 5.803419 4.159262 2.45 0.014 1.424409 23.64466

|

_cons | .0309278 .0181569 -5.92 0.000 .0097866 .0977386

------------------------------------------------------------------------------

--------------------------------------------------------------------------------------------------

-> gruppe = 88/89 FU

Logistic regression Number of obs = 698

Wald chi2(2) = 6.63

Prob > chi2 = 0.0364

Log pseudolikelihood = -205.29182 Pseudo R2 = 0.0190

------------------------------------------------------------------------------

| Robust

hpv_low | Odds Ratio Std. Err. z P>|z| [95% Conf. Interval]

-------------+----------------------------------------------------------------

sexpart |

1 | 1 (base)

2 | 2.529192 1.373351 1.71 0.087 .8725281 7.331351

3 | 3.812176 2.094357 2.44 0.015 1.298777 11.18952

|

_cons | .0366972 .0186957 -6.49 0.000 .0135202 .0996056

---------------------------------------------------------------------------
